# Supplementary material
Source: PubMed Central journal article supplement (PMC3108847)

# checkCIF/PLATON report

No syntax errors found.    CIF dictionary    Interpreting this report

## Datablock: mm05

---

Bond precision:    C-C = 0.0018 A

Wavelength=0.71073

Cell:            a=5.1333(1)            b=8.1443(2)            c=9.7610(2)  
                  alpha=73.269(1)        beta=76.874(1)        gamma=76.209(1)  
Temperature:    150 K

|                | Calculated           | Reported             |
|----------------|----------------------|----------------------|
| Volume         | 373.988(14)          | 373.988(14)          |
| Space group    | P -1                 | P-1                  |
| Hall group     | -P 1                 | -P 1                 |
| Moiety formula | C6 H6 F6 Mn N2 O6 S2 | C6 H6 F6 Mn N2 O6 S2 |
| Sum formula    | C6 H6 F6 Mn N2 O6 S2 | C6 H6 F6 Mn N2 O6 S2 |
| Mr             | 435.21               | 435.19               |
| Dx,g cm-3      | 1.932                | 1.932                |
| Z              | 1                    | 1                    |
| Mu (mm-1)      | 1.257                | 1.257                |
| F000           | 215.0                | 215.0                |
| F000'          | 215.76               |                      |
| h,k,lmax       | 8,12,15              | 7,12,15              |
| Nref           | 2989                 | 2916                 |
| Tmin,Tmax      | 0.578,0.839          | 0.553,0.849          |
| Tmin'          | 0.502                |                      |

Correction method= MULTI-SCAN

Data completeness= 0.976

Theta(max)= 33.730

R(reflections)= 0.0248( 2667)

wR2(reflections)= 0.0731( 2916)

S = 1.109

Npar= 106

---

The following ALERTS were generated. Each ALERT has the format

**test-name\_ALERT\_alert-type\_alert-level.**

Click on the hyperlinks for more details of the test.

---

### Alert level A

PLAT774\_ALERT\_1\_A Suspect X-Y Bond in CIF:    MN1    --    MN1    ..    5.13 Ang.

---

### Alert level C

PLAT029\_ALERT\_3\_C \_diffn\_measured\_fraction\_theta\_full Low .....    0.98

PLAT230\_ALERT\_2\_C Hirshfeld Test Diff for    S1    --    C3    ..    6.03 su

PLAT232\_ALERT\_2\_C Hirshfeld Test Diff (M-X) Mn1 -- N1 .. 9.29 su  
PLAT741\_ALERT\_1\_C Bond Calc 5.13330(10), Rep 5.13330 ..... Missing su  
MN1 -MN1 1.555 1.655

---

● **Alert level G**

PLAT154\_ALERT\_1\_G The su's on the Cell Angles are Equal (x 10000) 100 Deg.  
PLAT764\_ALERT\_4\_G Overcomplete CIF Bond List Detected (Rep/Expd) . 1.13 Ratio

---

1 **ALERT level A** = In general: serious problem  
0 **ALERT level B** = Potentially serious problem  
4 **ALERT level C** = Check and explain  
2 **ALERT level G** = General alerts; check

3 ALERT type 1 CIF construction/syntax error, inconsistent or missing data  
2 ALERT type 2 Indicator that the structure model may be wrong or deficient  
1 ALERT type 3 Indicator that the structure quality may be low  
1 ALERT type 4 Improvement, methodology, query or suggestion  
0 ALERT type 5 Informative message, check

---

## Datablock: pjr02

---

Bond precision: F- C = 0.0035 A

Wavelength=0.71073

Cell: a=18.3774(6) b=6.9991(3) c=6.5928(2)  
alpha=90 beta=104.072(2) gamma=90  
Temperature: 150 K

|                | Calculated              | Reported                |
|----------------|-------------------------|-------------------------|
| Volume         | 822.55(5)               | 822.55(5)               |
| Space group    | C 2/m                   | C2/m                    |
| Hall group     | -C 2y                   | -C 2y                   |
| Moiety formula | H12 Mn O6, 2(C F3 O3 S) | H12 Mn O6, 2(C F3 O3 S) |
| Sum formula    | C2 H12 F6 Mn O12 S2     | C2 H12 F6 Mn O12 S2     |
| Mr             | 461.20                  | 461.18                  |
| Dx,g cm-3      | 1.862                   | 1.862                   |
| Z              | 2                       | 2                       |
| Mu (mm-1)      | 1.170                   | 1.170                   |
| F000           | 462.0                   | 462.0                   |
| F000'          | 463.61                  |                         |
| h,k,lmax       | 28,10,10                | 28,10,10                |
| Nref           | 1754                    | 1736                    |
| Tmin,Tmax      | 0.672,0.900             | 0.673,0.902             |
| Tmin'          | 0.642                   |                         |

Correction method= MULTI-SCAN

Data completeness= 0.990

Theta(max)= 33.720

R(reflections)= 0.0306( 1479)      wR2(reflections)= 0.0834( 1736)

S = 1.054

Npar= 74

---

The following ALERTS were generated. Each ALERT has the format

**test-name\_ALERT\_alert-type\_alert-level.**

Click on the hyperlinks for more details of the test.

---

● **Alert level C**

|                   |                                                  |                                  |      |
|-------------------|--------------------------------------------------|----------------------------------|------|
| PLAT242_ALERT_2_C | Check Low                                        | Ueq as Compared to Neighbors for | Mn1  |
| PLAT242_ALERT_2_C | Check Low                                        | Ueq as Compared to Neighbors for | S1   |
| PLAT242_ALERT_2_C | Check Low                                        | Ueq as Compared to Neighbors for | C1   |
| PLAT250_ALERT_2_C | Large U3/U1 Ratio for Average U(i,j) Tensor .... |                                  | 2.21 |

---

0 **ALERT level A** = In general: serious problem

0 **ALERT level B** = Potentially serious problem

4 **ALERT level C** = Check and explain

0 **ALERT level G** = General alerts; check

0 ALERT type 1 CIF construction/syntax error, inconsistent or missing data

4 ALERT type 2 Indicator that the structure model may be wrong or deficient

0 ALERT type 3 Indicator that the structure quality may be low

0 ALERT type 4 Improvement, methodology, query or suggestion

0 ALERT type 5 Informative message, check

---

## Datablock: pjr03

---

Bond precision: C-C = 0.0029 A

Wavelength=0.71073

Cell: a=10.4628(3)

b=9.2867(2)

c=14.3842(4)

alpha=90

beta=95.981(2)

gamma=90

Temperature: 150 K

|                | Calculated             | Reported               |
|----------------|------------------------|------------------------|
| Volume         | 1390.03(6)             | 1390.03(6)             |
| Space group    | P n                    | Pn                     |
| Hall group     | P -2yac                | P -2yac                |
| Moiety formula | C22 H20 F6 Mn N4 O6 S2 | C22 H20 F6 Mn N4 O6 S2 |
| Sum formula    | C22 H20 F6 Mn N4 O6 S2 | C22 H20 F6 Mn N4 O6 S2 |
| Mr             | 669.50                 | 669.48                 |
| Dx,g cm-3      | 1.600                  | 1.600                  |
| Z              | 2                      | 2                      |
| Mu (mm-1)      | 0.710                  | 0.710                  |
| F000           | 678.0                  | 678.0                  |
| F000'          | 679.59                 |                        |
| h,k,lmax       | 16,14,22               | 16,14,22               |
| Nref           | 5568[ 11122]           | 10189                  |
| Tmin,Tmax      | 0.888,0.912            | 0.827,0.914            |
| Tmin'          | 0.820                  |                        |

Correction method= MULTI-SCAN

Data completeness= 1.83/0.92      Theta(max)= 33.730

R(reflections)= 0.0345( 8719)      wR2(reflections)= 0.0761( 10189)

S = 1.023      Npar= 450

The following ALERTS were generated. Each ALERT has the format  
**test-name\_ALERT\_alert-type\_alert-level**.  
Click on the hyperlinks for more details of the test.

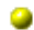

#### Alert level C

PLAT232\_ALERT\_2\_C Hirshfeld Test Diff (M-X) Mn1 -- N1 .. 5.19 su

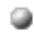

#### Alert level G

REFLT03\_ALERT\_4\_G Please check that the estimate of the number of Friedel pairs is correct. If it is not, please give the correct count in the `_publ_section_exptl_refinement` section of the submitted CIF.

From the CIF: `_diffrn_reflms_theta_max` 33.73

From the CIF: `_reflms_number_total` 10189

Count of symmetry unique reflns 5568

Completeness (`_total/calc`) 182.99%

TEST3: Check Friedels for noncentro structure

Estimate of Friedel pairs measured 4621

Fraction of Friedel pairs measured 0.830

Are heavy atom types Z>Si present yes

PLAT860\_ALERT\_3\_G Note: Number of Least-Squares Restraints ..... 2

PLAT033\_ALERT\_4\_G Flack x Parameter Value Deviates from Zero ..... 0.05

PLAT128\_ALERT\_4\_G Non-standard setting of Space-group Pc .... Pn

PLAT164\_ALERT\_4\_G Nr. of Refined C-H H-Atoms in Heavy-Atom Struct. 20

0 ALERT level A = In general: serious problem

0 ALERT level B = Potentially serious problem

1 **ALERT level C** = Check and explain  
5 **ALERT level G** = General alerts; check

0 ALERT type 1 CIF construction/syntax error, inconsistent or missing data  
1 ALERT type 2 Indicator that the structure model may be wrong or deficient  
1 ALERT type 3 Indicator that the structure quality may be low  
4 ALERT type 4 Improvement, methodology, query or suggestion  
0 ALERT type 5 Informative message, check

---

PLATON version of 1308090: check.def file version of 13082009

Datablock mm05 - ellipsoid plot

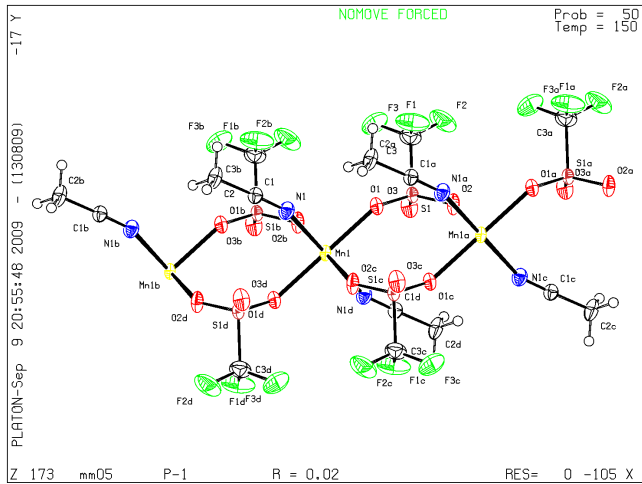

Datablock pj02 - ellipsoid plot

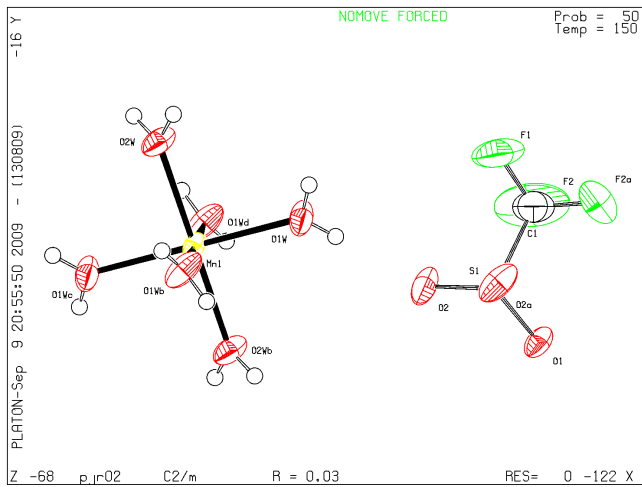

Datablock pj03 - ellipsoid plot

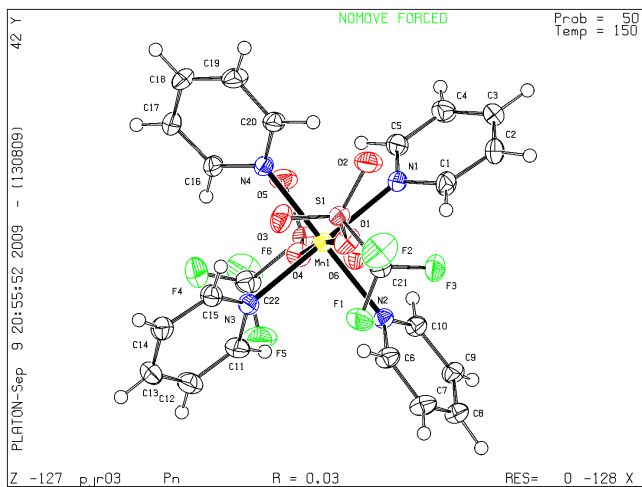

Supplement: NIHMS282865-supplement-01.pdf [file NIHMS282865-supplement-01.pdf]
